# Supplementary material for: Measles virus nucleo- and phosphoproteins form liquid-like phase-separated compartments that promote nucleocapsid assembly
Source: PubMed Central journal article supplement — Sci Adv. 2020 Apr 1;6(14):eaaz7095. doi: 10.1126/sciadv.aaz7095 (PMC7112944; doi:10.1126/sciadv.aaz7095), 2020-04-01
Supplement: aaz7095_SM.pdf [file aaz7095_SM.pdf]

## Supplementary Materials for

### **Measles virus nucleo- and phosphoproteins form liquid-like phase-separated compartments that promote nucleocapsid assembly**

Serafima Guseva, Sigrid Milles, Malene Ringkjøbing Jensen, Nicola Salvi, Jean-Philippe Kleman, Damien Maurin, Rob W. H. Ruigrok\*, Martin Blackledge\*

\*Corresponding author. Email: [martin.blackledge@ibs.fr](mailto:martin.blackledge@ibs.fr) (M.B.); [rob.ruigrok@ibs.fr](mailto:rob.ruigrok@ibs.fr) (R.W.H.R.)

Published 1 April 2020, *Sci. Adv.* **6**, eaaz7095 (2020)  
DOI: 10.1126/sciadv.aaz7095

#### **The PDF file includes:**

Table S1  
Figs. S1 to S8  
Legends for movies S1 and S2  
Data S1

#### **Other Supplementary Material for this manuscript includes the following:**

(available at [advances.sciencemag.org/cgi/content/full/6/14/eaaz7095/DC1](https://advances.sciencemag.org/cgi/content/full/6/14/eaaz7095/DC1))

Movie S1 and S2

**Table S1**

| P <sub>tot</sub> (μM) | N <sub>tot</sub> (μM) | P <sub>D</sub> (μM) | N <sub>D</sub> (μM) | ratio |
|-----------------------|-----------------------|---------------------|---------------------|-------|
| 75                    | 7,5                   | 43,23               | 5,77                | 0,13  |
| 75                    | 15                    | 54,60               | 8,64                | 0,16  |
| 75                    | 37,5                  | 72,3                | 13,49               | 0,19  |
| 75                    | 75                    | 75                  | 26,74               | 0,36  |

**Calculated ratio of [N]/[P] in liquid droplets as determined from NMR (see main text)**

**Fig. S1** SDS-PAGE (15%) with Coomassie staining of purified truncated constructs of P and P<sub>1</sub>.

507.

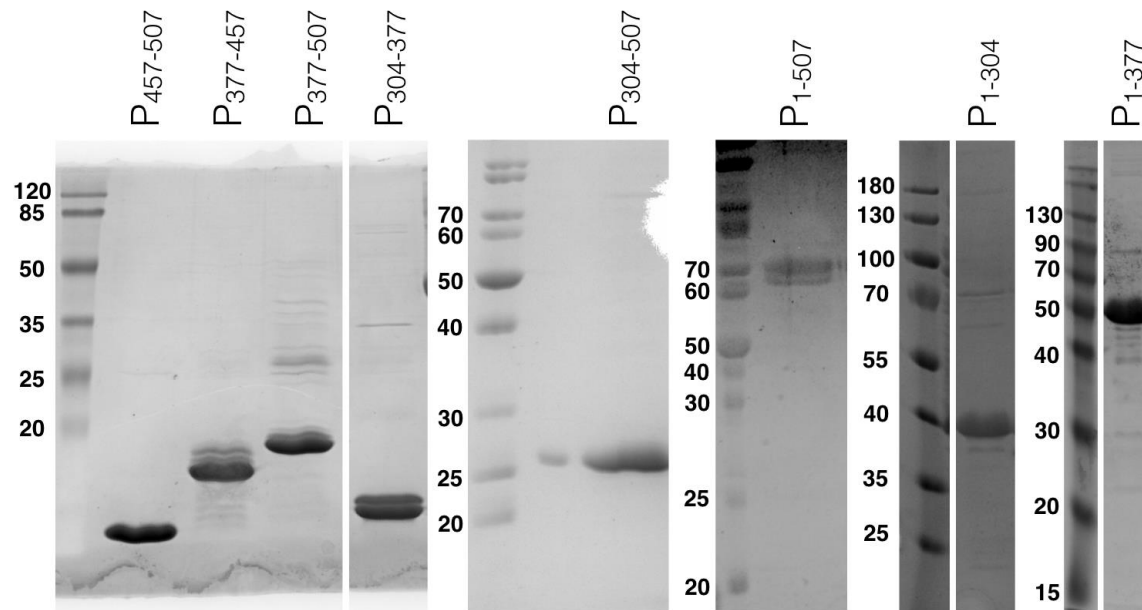

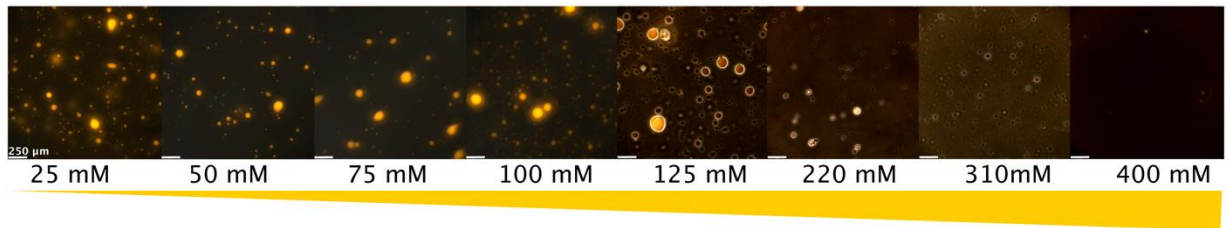

**Fig. S2**

Fluorescent images overlaid with DIC show the salt dependence of LLPS formation. P<sub>50N525</sub> (100 μM, 1% fluorescently labelled) and P<sub>304-507</sub> (100 μM) were used, NaCl concentration in buffer was increased linearly from 25 mM to 400 mM.

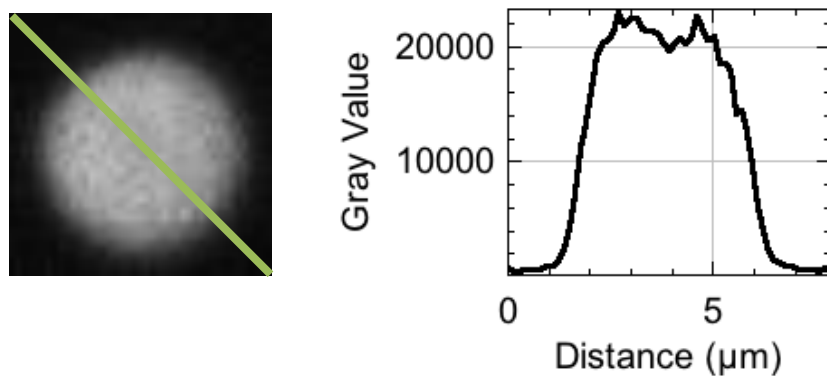

**Fig. S3**

Fluorescence image of a droplet formed by P<sub>50</sub>N<sub>525</sub> (25 μM, 0.04% labelled) and P<sub>304-507</sub> (50 μM) and its intensity profile represent homogeneous protein distribution within the droplet.

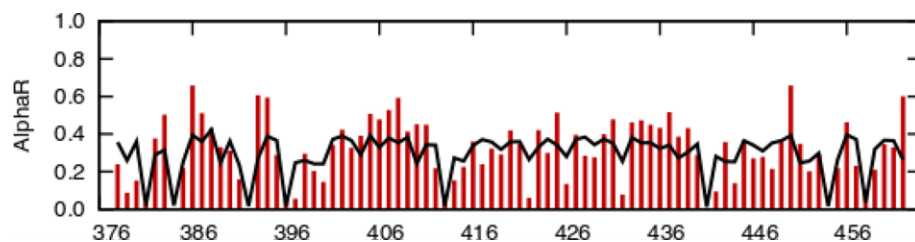

**Fig. S4. Secondary structural propensity of P<sub>LOOP</sub>**

Population of  $\alpha$ -helical secondary structure of P<sub>LOOP</sub> showing 15% and 10% difference between the statistical coil ensemble (black line) and the selected ensemble using ASTEROIDS (red bars) for regions 405-411 and 433-438 respectively.

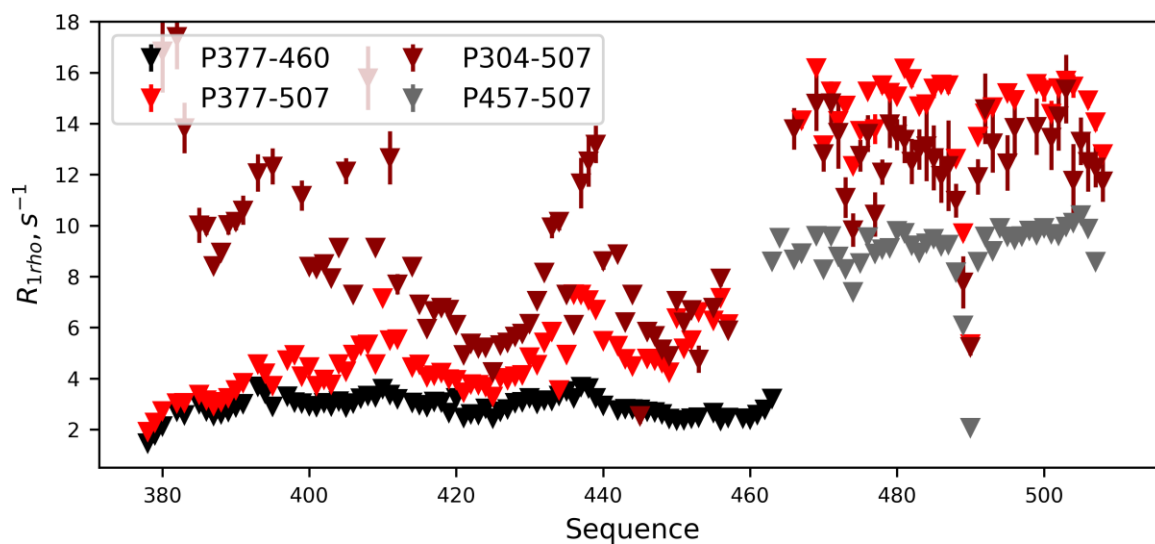

**Fig. S5. Dynamic behaviour of P<sub>LOOP</sub>**

<sup>15</sup>N R<sub>1ρ</sub> of P<sub>LOOP</sub> (concentration 500 μM), P<sub>XD</sub> (concentration 500 μM), P<sub>377-507</sub> (concentration 100 μM) and P<sub>304-507</sub> (concentration 100 μM) measured at 25°C, <sup>1</sup>H frequency of 850 MHz. Information about the tetramerization domain is not available as resonances for this region are not observable under these experimental conditions.

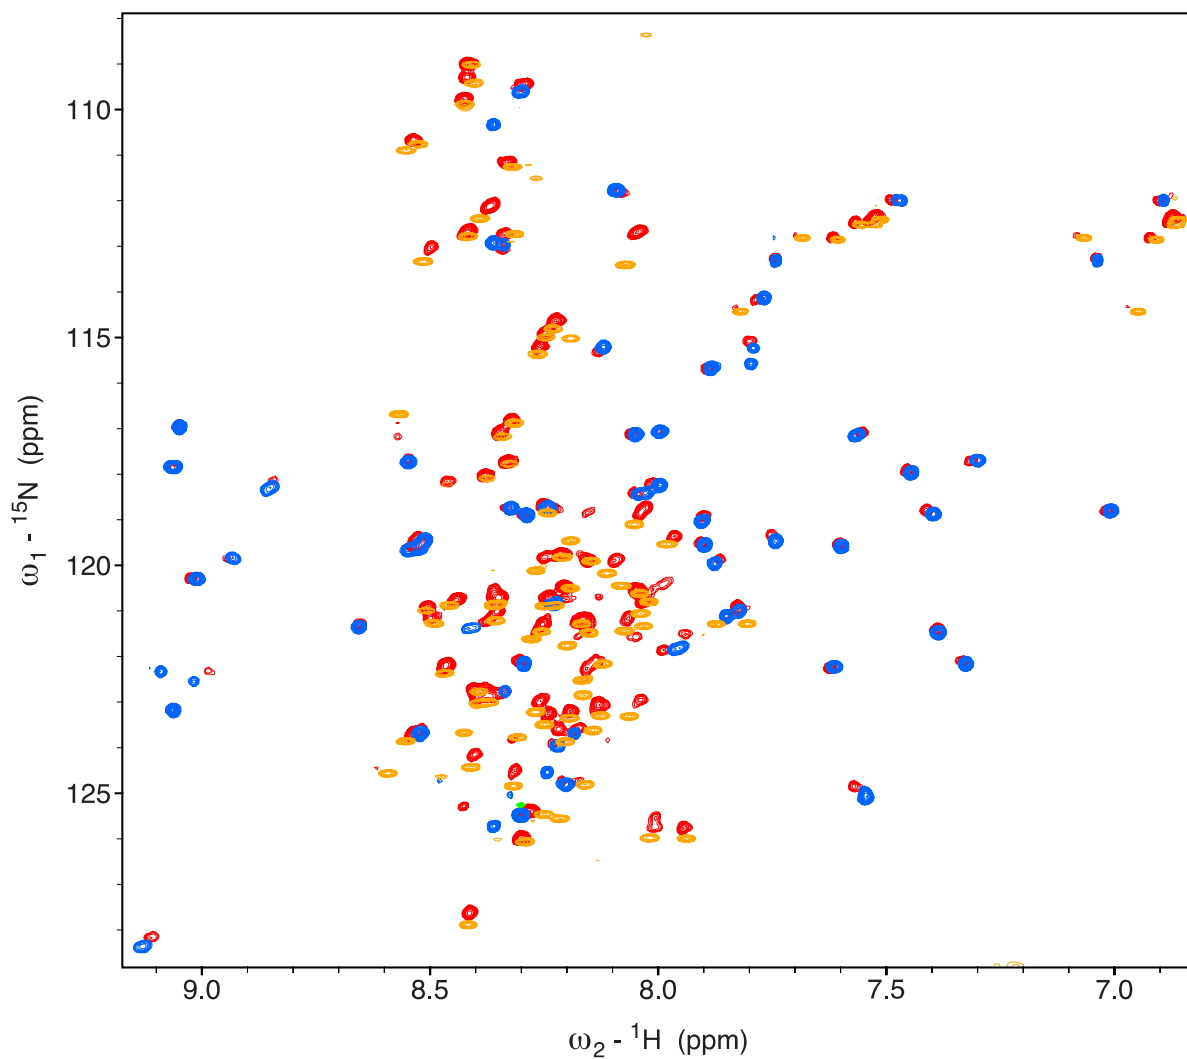

**Fig. S6 P<sub>LOOP</sub> remains unfolded in the context of phase separating protein constructs**

${}^1\text{H}$ - ${}^{15}\text{N}$  HSQC spectrum of P<sub>304-507</sub> (red) (298K, phosphate buffer, 150mM salt and pH 6.0, 240  $\mu\text{M}$ , 200 increments, 20 scans) overlapped with P<sub>LOOP</sub> (orange, 100  $\mu\text{M}$ , 200 increments, 20 scans) and P<sub>XD</sub> (blue, 100  $\mu\text{M}$ , 400 increments, 16 scans), all spectra were recorded at  ${}^1\text{H}$  frequency of 700 MHz.

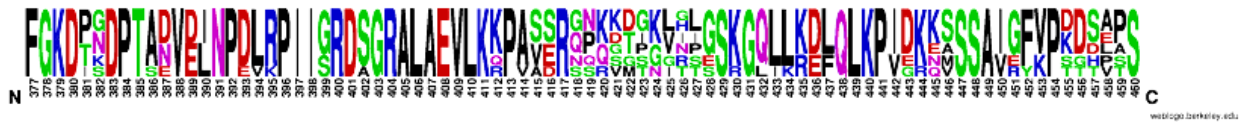

**Fig. S7 Sequence analysis of PLoop**

Measles virus phosphoprotein homologs were found using The Basic Local Alignment Search Tool (BLAST) from the Swiss-Prot database, non-truncated sequences were chosen for further analysis (110 sequences) and visualised using <https://weblogo.berkeley.edu> for residues 377-460.

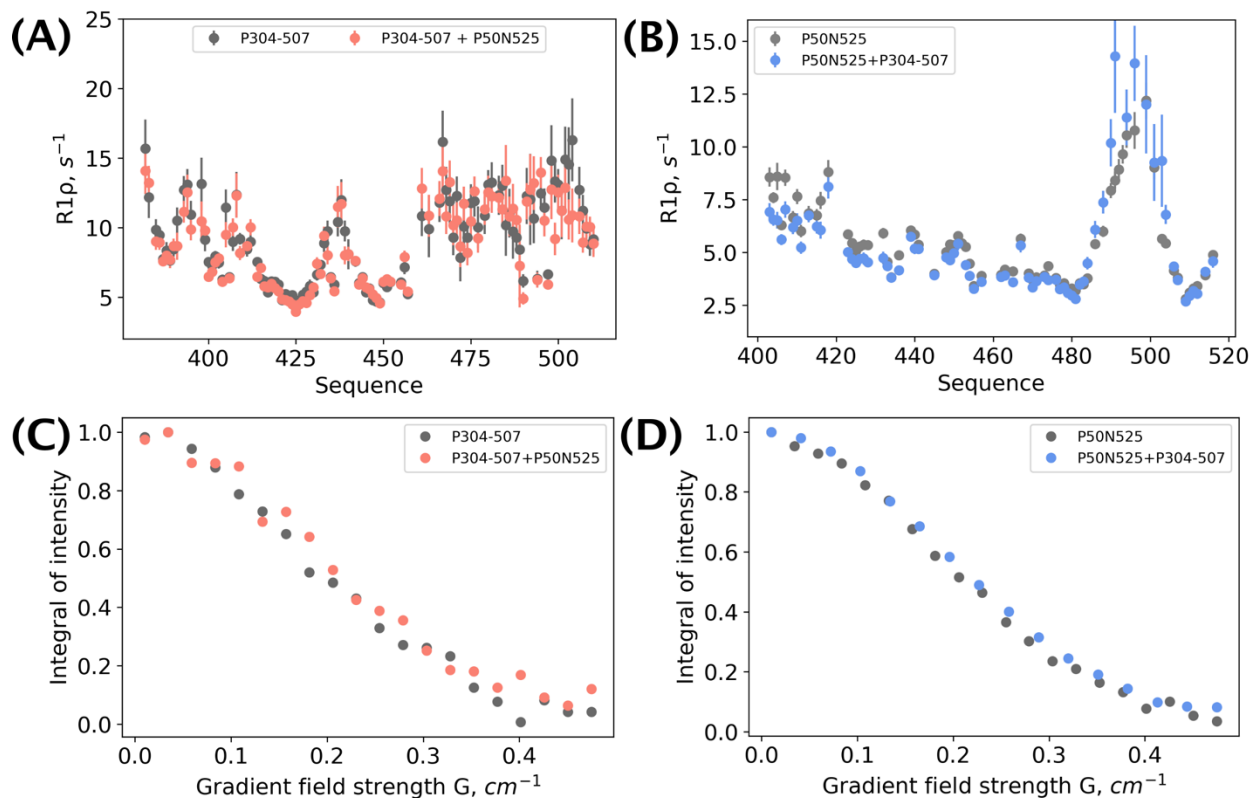

**Fig. S8** NMR signals of both P<sub>50</sub>N<sub>525</sub> and P<sub>304-507</sub> at phase separating conditions exhibit similar characteristics as for the same proteins in the dilute phase.  $R_{1\rho}$  profiles at 25°C 700 MHz for (A) P<sub>304-507</sub> alone (100  $\mu$ M, grey) and with P<sub>50</sub>N<sub>525</sub> (10  $\mu$ M, salmon pink); (B) P<sub>50</sub>N<sub>525</sub> alone (100  $\mu$ M, grey) and with P<sub>304-507</sub> (10  $\mu$ M, blue) measured at 25°C 850 MHz. Translational diffusion for (C) P<sub>304-507</sub> alone (75  $\mu$ M, grey) and with P<sub>50</sub>N<sub>525</sub> (7.5  $\mu$ M salmon pink); (D) P<sub>50</sub>N<sub>525</sub> alone (75  $\mu$ M, grey) and with P<sub>304-507</sub> (37.5  $\mu$ M, blue).



**Movie S1.**

Droplets formed by P<sub>50N525</sub> (10 μM) and P<sub>304-507</sub> (100 μM) highlighting examples of fusion upon touching within several seconds. The video speed is accelerated by a factor of 2. Scale bar is 24 μM.

**Movie S2.**

Fluorescence microscopy images showing RNA diffusing into droplets pre-formed by mixing P<sub>50N525</sub> (20 μM) and P<sub>304-507</sub> (80 μM). Concentration of RNA was 200 μM (with 10% labelled RNA-FAM). RNA was added on one side of the coverslip and spontaneously diffused in the sample, the time gap between images is 2 seconds. Scale bar is 240 μm.

## Data S1. Chemical shift assignment of PLoop

Phosphate buffer 50 mM, pH 6.0

NaCl 150 mM

DTT 2 mM

298K

|     | N       | H     | CO      | CA      |
|-----|---------|-------|---------|---------|
| 378 | 110.825 | 8.547 | 173.598 | 45.1    |
| 379 | 120.357 | 8.075 | 176.122 | 55.6725 |
| 380 | 124.46  | 8.585 | -       | 51.967  |
| 381 | -       | -     | 176.947 | 63.866  |
| 382 | 116.607 | 8.56  | 174.73  | 53.2185 |
| 383 | 121.187 | 7.868 | 174.841 | 51.963  |
| 384 | -       | -     | 177.501 | 63.791  |
| 385 | 112.628 | 8.307 | 174.57  | 62.221  |
| 386 | 125.898 | 7.931 | 177.289 | 52.525  |
| 387 | 120.012 | 8.261 | 176.157 | 54.3155 |
| 388 | 119.453 | 7.975 | 175.915 | 62.016  |
| 389 | 124.335 | 8.404 | 176.204 | 56.325  |
| 390 | 122.421 | 8.158 | 175.570 | 60.769  |
| 391 | 123.769 | 8.544 | 175.475 | 50.978  |
| 392 | -       | -     | 176.839 | 63.799  |
| 393 | 118.767 | 8.237 | 176.206 | 54.675  |
| 394 | 121.208 | 7.801 | 176.957 | 54.8565 |
| 395 | 123.226 | 8.057 | 174.311 | 54.424  |
| 396 | -       | -     | 176.76  | 62.97   |
| 397 | 121.527 | 8.27  | 176.414 | 61.1525 |
| 398 | 125.462 | 8.209 | 176.664 | 61.0285 |
| 399 | 113.247 | 8.508 | -       | 45.27   |
| 400 | 120.772 | 8.211 | 175.369 | 56.342  |
| 401 | 121.18  | 8.484 | 176.527 | 54.325  |
| 402 | 116.791 | 8.308 | 174.497 | 59.009  |
| 403 | 110.679 | 8.52  | -       | 45.643  |
| 404 | 120.718 | 8.015 | 176.277 | 56.2955 |
| 405 | 124.762 | 8.311 | 178.064 | 52.741  |
| 406 | 121.392 | 8.145 | 177.412 | 55.471  |
| 407 | 123.543 | 8.137 | 178.092 | 52.8755 |
| 408 | 119.372 | 8.186 | 176.854 | 56.8525 |
| 409 | 120.959 | 8.032 | 176.299 | 62.8285 |
| 410 | 124.725 | 8.154 | 177.172 | 55.149  |
| 411 | 122.084 | 8.115 | 176.176 | 56.105  |
| 412 | 123.781 | 8.196 | 174.404 | 54.235  |
| 413 | -       | -     | 176.956 | 63.005  |
| 414 | 120.81  | 8.238 | 176.162 | 62.334  |
| 415 | 127.802 | 8.409 | 177.804 | 52.554  |
| 416 | 115.276 | 8.258 | 174.830 | 58.399  |
| 417 | 122.887 | 8.355 | 176.364 | 56.477  |
| 418 | 121.129 | 8.35  | 176.079 | 56.0555 |
| 419 | 123.42  | 8.248 | 177.496 | 55.307  |
| 420 | 120.78  | 8.343 | 176.515 | 56.2045 |

|     |         |       |         |         |
|-----|---------|-------|---------|---------|
| 421 | 109.802 | 8.418 | 174.26  | 45.393  |
| 422 | 119.745 | 8.205 | 176.704 | 55.594  |
| 423 | 114.736 | 8.223 | 174.476 | 61.8445 |
| 424 | 120.912 | 8.501 | 175.683 | 53.414  |
| 425 | 108.94  | 8.403 | 174.228 | 53.7865 |
| 426 | 120.423 | 8.187 | 176.710 | 56.241  |
| 427 | 114.908 | 8.237 | 174.672 | 61.821  |
| 428 | 118.005 | 8.367 | 174.731 | 58.2235 |
| 429 | 118.119 | 8.451 | 174.817 | 58.525  |
| 430 | 122.69  | 8.385 | 177.03  | 56.721  |
| 431 | 109.341 | 8.398 | 174.29  | 45.52   |
| 432 | 119.83  | 8.141 | 176.09  | 55.967  |
| 433 | 123.153 | 8.263 | 177.379 | 55.401  |
| 434 | 122.777 | 8.158 | 177.498 | 55.2965 |
| 435 | 121.688 | 8.193 | 176.799 | 56.7215 |
| 436 | 120.792 | 8.358 | 176.455 | 57.0605 |
| 437 | 120.096 | 8.107 | 175.580 | 57.8815 |
| 438 | 121.372 | 8.069 | 175.441 | 55.6295 |
| 439 | 123.226 | 8.121 | 176.98  | 55.143  |
| 440 | 123.287 | 8.188 | 174.287 | 54.016  |
| 441 | -       | -     | 176.959 | 63.176  |
| 442 | 121.382 | 8.249 | 176.902 | 61.241  |
| 443 | 112.707 | 8.41  | 173.911 | 53.479  |
| 444 | 121.208 | 8.16  | 176.546 | 56.162  |
| 445 | 122.953 | 8.381 | 176.632 | 56.408  |
| 446 | 122.294 | 8.461 | 176.3   | 47.0785 |
| 447 | 117.099 | 8.336 | 174.536 | 58.301  |
| 448 | 117.699 | 8.32  | 174.152 | 58.23   |
| 449 | 125.997 | 8.287 | 177.706 | 52.516  |
| 450 | 119.024 | 8.046 | 176.698 | 62.557  |
| 451 | 112.3   | 8.384 | 173.454 | 53.363  |
| 452 | 120.551 | 8.035 | 175.076 | 57.809  |
| 453 | 125.899 | 8.014 | 173.687 | 59.259  |
| 454 | -       | -     | 176.44  | 62.95   |
| 455 | 120.785 | 8.452 | 176.577 | 54.386  |
| 456 | 113.322 | 8.066 | 174.994 | 61.418  |
| 457 | 111.182 | 8.317 | -       | 44.798  |
| 458 | -       | -     | 177.126 | 63.412  |
| 459 | 123.569 | 8.419 | 177.996 | 52.58   |
| 460 | 114.92  | 8.183 | 174.749 | 58.295  |
